# Supplementary material
Source: PubMed Central journal article supplement (PMC3648163)
Supplement: JVI.00152-13_zjv999097627so1.pdf [file JVI.00152-13_zjv999097627so1.pdf]

## Supplemental Material

Mann et al. *Conformation-dependent recognition of HIV gp120 by Designed Ankyrin Repeat Proteins provides access to novel HIV entry inhibitors*

Journal of Virology 2013

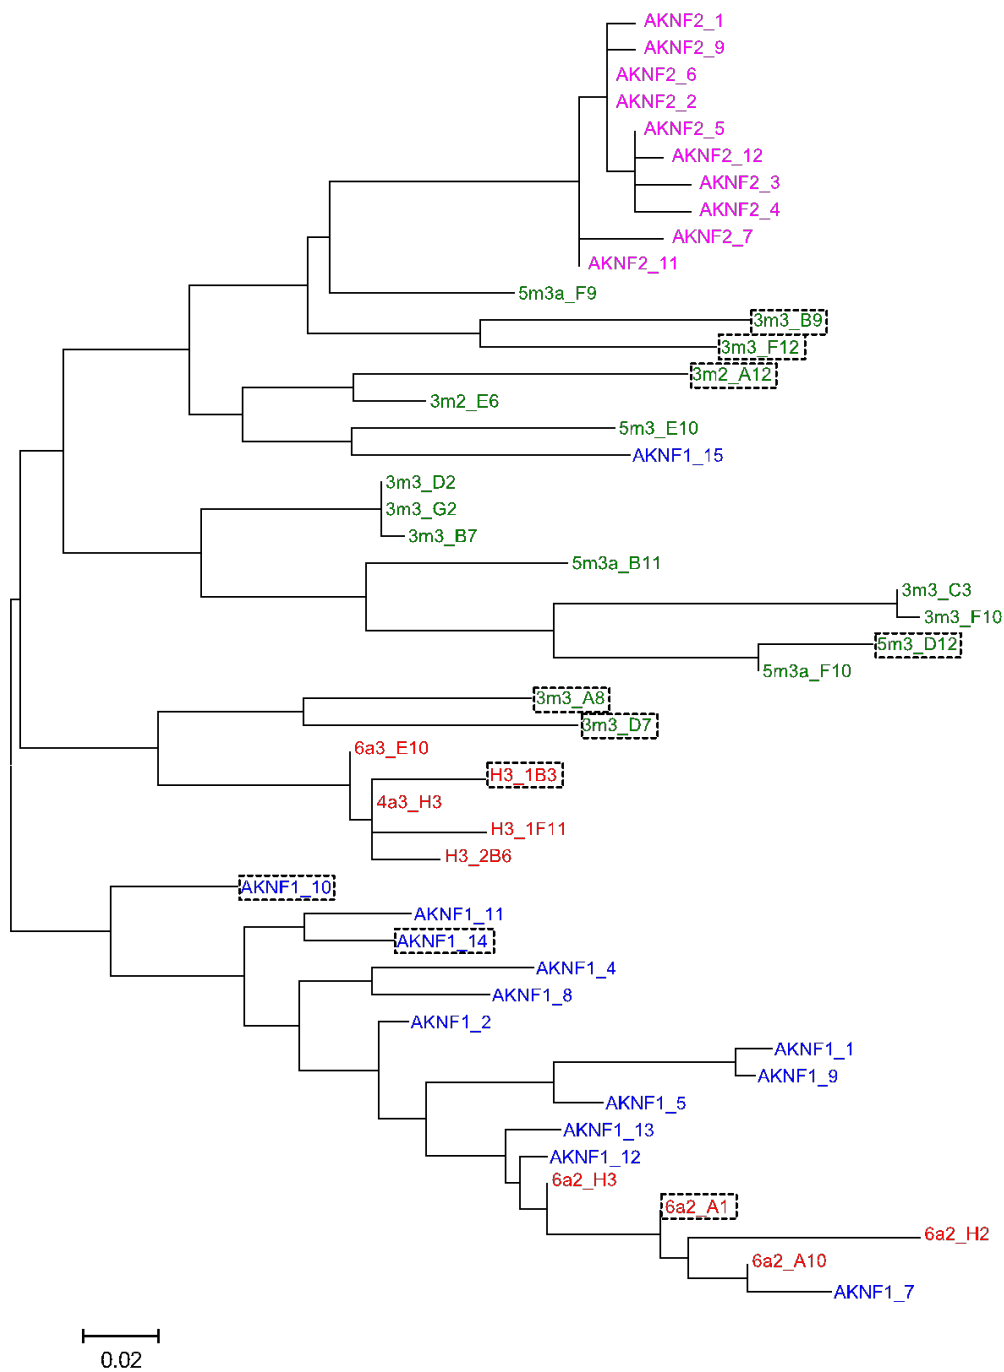

**Figure S1. Phylogenetic analysis of DARPin sequences.** A phylogenetic tree including amino acid sequences from all derived gp120 specific DARPin binders.

Binders from Selection I are shown in red, Selection II in green, Selection III in blue and Selection IV in pink. Binders that were followed up in detail are boxed with a dashed line. The evolutionary history was inferred by using the Maximum Likelihood method based on the JTT matrix-based model (1). The tree with the highest log likelihood (-2689.0018) is shown. Initial tree(s) for the heuristic search were obtained automatically with the BIONJ method with MCL distance matrix. The tree is drawn to scale, with branch lengths measured in the number of substitutions per site. The analysis involved 48 amino acid sequences. There were a total of 168 positions in the final dataset. Evolutionary analyses were conducted in MEGA5 (2).

### NMR studies of cyclic peptides

<sup>1</sup>H NMR measurements were performed in H<sub>2</sub>O/D<sub>2</sub>O (9:1) or pure D<sub>2</sub>O, at pH 5.0, at 1-3 mM peptide. Spectra were acquired on a Bruker AV-600 spectrometer at 300 K. Data were processed using TOPSPIN 2.1 (Bruker) or XEASY (3). Water suppression was performed by presaturation. Spectral assignments were made using 2D DQF-COSY, TOCSY and NOESY spectra. *Cis* and *trans* peptide bond rotamers in slow exchange were observed at the Gly<sup>312</sup>-Pro<sup>313</sup> peptide bond, at the tip of the loop in each mimetic, in the ratios shown in the Figure below. A full assignment was only possible for the *trans* rotamers, due to signal overlap, and structure calculations were performed using NOE-derived restraints for only the *trans* rotamers. <sup>3</sup>J<sub>H<sub>NH</sub>α</sub> coupling constants were determined from 1D spectra or from 2D NOESY spectra by inverse Fourier transformation of in-phase multiplets (4).

Chemical shift assignments for the four cyclic peptides are given below.

**Table S1 - Chemical shift assignments for HF.**

| Residue             | NH   | αH         | βH         | Others                                                                    |
|---------------------|------|------------|------------|---------------------------------------------------------------------------|
| Arg <sup>1</sup>    | 7.71 | 4.44       | 1.79, 1.79 | γCH <sub>2</sub> 1.49, 1.59; δCH <sub>2</sub> 3.19, 3.19; εNH 7.23        |
| Ile <sup>2</sup>    | 8.23 | 3.88       | 1.42       | γCH <sub>3</sub> 0.68; γCH <sub>2</sub> 0.76, 0.81; δCH <sub>3</sub> 0.64 |
| His <sup>3</sup>    | 8.51 | 4.49       | 2.25, 2.26 | δCH 6.91; εCH 8.44                                                        |
| Ile <sup>4</sup>    | 8.28 | 4.27       | 1.79       | γCH <sub>3</sub> 0.86; γCH <sub>2</sub> 1.09, 1.39; δCH <sub>3</sub> 0.79 |
| Gly <sup>5</sup>    | 8.16 | 4.08, 4.32 | -          | -                                                                         |
| Pro <sup>6</sup>    | -    | 4.49       | 2.03, 2.28 | γCH <sub>2</sub> 2.04, 2.10; δCH <sub>2</sub> 3.65, 3.65                  |
| Gly <sup>7</sup>    | 8.60 | 3.95, 4.04 | -          | -                                                                         |
| Arg <sup>8</sup>    | 7.95 | 4.41       | 1.75, 1.83 | γCH <sub>2</sub> 1.59, 1.59; δCH <sub>2</sub> 3.19, 3.19; εNH 7.15        |
| Ala <sup>9</sup>    | 8.44 | 4.73       | 1.29       | -                                                                         |
| Phe <sup>10</sup>   | 8.14 | 4.92       | 3.10, 3.10 | δCH 7.08; εCH 7.12                                                        |
| Tyr <sup>11</sup>   | 8.80 | 5.03       | 2.82, 3.23 | εCH 6.74; δCH 7.04                                                        |
| Thr <sup>12</sup>   | 8.81 | 4.88       | 4.28       | γCH <sub>3</sub> 1.27                                                     |
| D-Pro <sup>13</sup> | -    | 4.81       | 1.92, 2.35 | γCH <sub>2</sub> 2.06, 2.16; δCH <sub>2</sub> 3.60, 3.92                  |
| Pro <sup>14</sup>   | -    | 4.57       | 2.13, 2.28 | γCH <sub>2</sub> 1.97, 2.11; δCH <sub>2</sub> 3.75, 3.96                  |

**Table S2 - Chemical shift assignments for IY.**

| Residue             | NH   | $\alpha$ H | $\beta$ H  | Others                                                                                                           |
|---------------------|------|------------|------------|------------------------------------------------------------------------------------------------------------------|
| Lys <sup>1</sup>    | 7.89 | 4.40       | 1.80, 1.80 | $\gamma$ CH <sub>2</sub> 1.34, 1.43; $\delta$ CH <sub>2</sub> 1.66, 1.66; $\epsilon$ CH <sub>2</sub> 2.97, 2.97; |
| Arg <sup>2</sup>    | 8.44 | 4.85       | 1.46, 1.59 | $\gamma$ CH <sub>2</sub> 1.31, 1.46; $\delta$ CH <sub>2</sub> 2.57, 2.75; $\epsilon$ NH 6.85                     |
| Ile <sup>3</sup>    | 9.01 | 4.35       | 1.40       | $\gamma$ CH <sub>3</sub> 0.84; $\gamma$ CH <sub>2</sub> 1.10, 1.31; $\delta$ CH <sub>3</sub> 0.76                |
| His <sup>4</sup>    | 9.00 | 4.53       | 3.00, 3.14 | $\delta$ CH 7.03; $\epsilon$ CH 8.54                                                                             |
| Ile <sup>5</sup>    | 8.07 | 4.29       | 1.77       | $\gamma$ CH <sub>3</sub> 0.95; $\gamma$ CH <sub>2</sub> 1.04, 1.53; $\delta$ CH <sub>3</sub> 0.83                |
| Gly <sup>6</sup>    | 7.88 | 3.75, 4.03 | -          | -                                                                                                                |
| Pro <sup>7</sup>    | -    | 4.63       | 2.16, 2.42 | $\gamma$ CH <sub>2</sub> 1.86, 1.96; $\delta$ CH <sub>2</sub> 3.53, 3.53                                         |
| Gly <sup>8</sup>    | 8.88 | 4.01, 4.07 | -          | -                                                                                                                |
| Arg <sup>9</sup>    | 8.86 | 4.42       | 1.79, 2.09 | $\gamma$ CH <sub>2</sub> 1.68, 1.71; $\delta$ CH <sub>2</sub> 3.25, 3.25; $\epsilon$ NH 7.27                     |
| Ala <sup>10</sup>   | 7.64 | 4.39       | 1.31       | -                                                                                                                |
| Phe <sup>11</sup>   | 8.32 | 5.36       | 2.82, 2.82 | $\delta$ CH 7.08; $\epsilon$ CH 7.26                                                                             |
| Tyr <sup>12</sup>   | 9.00 | 4.98       | 2.99, 3.11 | $\epsilon$ CH 6.74; $\delta$ CH 7.04                                                                             |
| Thr <sup>13</sup>   | 8.56 | 5.13       | 4.11       | $\gamma$ CH <sub>3</sub> 1.18                                                                                    |
| Thr <sup>14</sup>   | 8.62 | 4.87       | 4.11       | $\gamma$ CH <sub>3</sub> 1.23                                                                                    |
| D-Pro <sup>15</sup> | -    | 4.76       | 1.91, 2.33 | $\gamma$ CH <sub>2</sub> 2.04, 2.15; $\delta$ CH <sub>2</sub> 3.68, 3.91                                         |
| Pro <sup>16</sup>   | -    | 4.55       | 2.11, 2.23 | $\gamma$ CH <sub>2</sub> 1.92, 2.08; $\delta$ CH <sub>2</sub> 3.71, 3.95                                         |

**Table S3 - Chemical shift assignments for IF.**

| Residue             | NH   | $\alpha$ H | $\beta$ H  | Others                                                                                                           |
|---------------------|------|------------|------------|------------------------------------------------------------------------------------------------------------------|
| Lys <sup>1</sup>    | 7.74 | 4.43       | 1.81, 1.86 | $\gamma$ CH <sub>2</sub> 1.36, 1.43; $\delta$ CH <sub>2</sub> 1.65, 1.65; $\epsilon$ CH <sub>2</sub> 2.95, 2.95; |
| Ser <sup>2</sup>    | 8.32 | 4.49       | 3.39, 3.46 |                                                                                                                  |
| Ile <sup>3</sup>    | 8.50 | 4.25       | 1.54       | $\gamma$ CH <sub>3</sub> 0.79; $\gamma$ CH <sub>2</sub> 1.10, 1.28; $\delta$ CH <sub>3</sub> 0.77                |
| His <sup>4</sup>    | 8.68 | 4.78       | 3.07, 3.17 | $\delta$ CH 7.14; $\epsilon$ CH 8.46                                                                             |
| Ile <sup>5</sup>    | 8.33 | 4.30       | 1.81       | $\gamma$ CH <sub>3</sub> 0.88; $\gamma$ CH <sub>2</sub> 1.06, 1.36; $\delta$ CH <sub>3</sub> 0.79                |
| Gly <sup>6</sup>    | 8.08 | 4.06, 4.15 | -          | -                                                                                                                |
| Pro <sup>7</sup>    | -    | 4.48       | 2.03, 2.28 | $\gamma$ CH <sub>2</sub> 2.03, 2.09; $\delta$ CH <sub>2</sub> 3.64, 3.64                                         |
| Gly <sup>8</sup>    | 8.73 | 3.95, 4.04 | -          | -                                                                                                                |
| Arg <sup>9</sup>    | 8.08 | 4.47       | 1.56, 1.70 | $\gamma$ CH <sub>2</sub> 1.55, 1.55; $\delta$ CH <sub>2</sub> 3.17, 3.17; $\epsilon$ NH 7.15                     |
| Ala <sup>10</sup>   | 8.37 | 4.64       | 1.06       | -                                                                                                                |
| Phe <sup>11</sup>   | 8.37 | 4.79       | 2.98, 3.04 | $\delta$ CH 7.15; $\epsilon$ CH 7.28                                                                             |
| Tyr <sup>12</sup>   | 8.57 | 4.99       | 2.78, 3.10 | $\epsilon$ CH 6.75; $\delta$ CH 7.06                                                                             |
| Thr <sup>13</sup>   | 8.71 | 4.73       | 4.12       | $\gamma$ CH <sub>3</sub> 1.22                                                                                    |
| D-Pro <sup>14</sup> | -    | 4.92       | 2.01, 2.30 | $\delta$ CH <sub>2</sub> 3.68, 3.91                                                                              |
| Pro <sup>15</sup>   | -    | 4.55       | 2.13, 2.27 | $\gamma$ CH <sub>2</sub> 1.98, 2.11; $\delta$ CH <sub>2</sub> 3.71, 4.01                                         |



**Figure S2.** A summary of long range NOEs observed in  $^1\text{H}$  NMR 2D-NOESY plots for each mimetic are shown, along with  $^3J_{\text{HNH}\alpha}$  values (Hz) and the temperature-dependence of amide chemical shifts ( $-\Delta\delta/T$  ppb/K).

Distance restraints were obtained from NOESY spectra with a mixing time of 250 ms. Spectra were typically collected with 1024 x 256 complex data points zero-filled prior to Fourier transformation to 2048 x 1024, and transformed with a cosine-bell weighting function. The structure calculations were performed by restrained molecular dynamics in torsion angle space using NOE-derived distance restraints and DYANA (5). Starting from 100 randomized conformations a bundle of 20 final structures were selected with the lowest DYANA target energy function. The program MOLMOL (6) was used for structure analysis and visualization of molecular models. DYANA structures were optimized by energy minimization using the program MOE (Chemical Computing Group, Canada).

**Table S5 - Statistics from the DYANA structure calculations for each mimetic, having the HF, IY, IF and HY registers (see Figure 7)**

| Mimetic =                                         | HF              | IY              | IF              | HY              |
|---------------------------------------------------|-----------------|-----------------|-----------------|-----------------|
| NOE upper-distance limits:                        | 126             | 144             | 122             | 128             |
| Intraresidue                                      | 43              | 42              | 31              | 32              |
| Sequential                                        | 46              | 62              | 59              | 53              |
| Medium-and long range                             | 37              | 40              | 32              | 43              |
| Residual target function value ( $\text{\AA}^2$ ) | $1.04 \pm 0.04$ | $0.96 \pm 0.05$ | $0.89 \pm 0.08$ | $0.80 \pm 0.05$ |
| Mean rmsd value ( $\text{\AA}$ )                  |                 |                 |                 |                 |
| All backbone atoms                                | $0.93 \pm 0.44$ | $1.01 \pm 0.50$ | $0.53 \pm 0.15$ | $0.79 \pm 0.25$ |
| All heavy atoms                                   | $1.88 \pm 0.46$ | $2.03 \pm 0.63$ | $1.58 \pm 0.35$ | $1.57 \pm 0.32$ |
| Residual NOE violations                           |                 |                 |                 |                 |
| Number > 0.2 $\text{\AA}$                         | 2               | 5               | 6               | 6               |
| Maximum ( $\text{\AA}$ )                          | 0.36            | 0.28            | 0.27            | 0.25            |

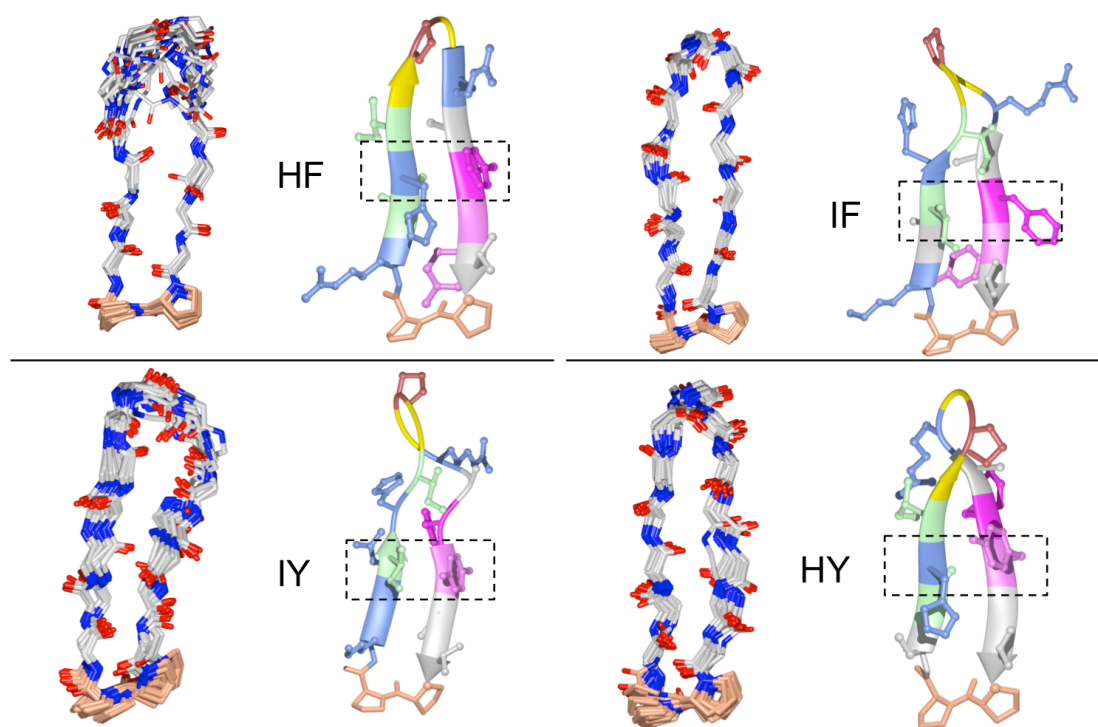

**Figure S3.** A backbone superimposition of the final 20 NMR structures having the lowest energy function for each of the cyclic peptides is shown (*left*) (no side chains included for clarity); one typical structure of each mimetic is shown (*right*), with same coloring of equivalent residues (Ile green, Phe dark pink, Tyr light pink, Pro orange, Gly yellow). The D-Pro-L-Pro template is at the bottom of each structure. Dotted boxes indicate for each mimetic residue pairs at a cross-strand hydrogen-bonding position that define the hairpin register.

**Table S6. Alignment of V3 sequences of virus isolates probed in Figures 5 and 9.** (Amino acid positions numbering according to HXB2).

| Table A1                |                | V3 loop sequence |     |     |     |     |     |     |     |     |     |     |     |     |     |     |     |     |     |     |     |     |     |     |     |     |     |     |     |     |     |     |     |     |     |     |     |
|-------------------------|----------------|------------------|-----|-----|-----|-----|-----|-----|-----|-----|-----|-----|-----|-----|-----|-----|-----|-----|-----|-----|-----|-----|-----|-----|-----|-----|-----|-----|-----|-----|-----|-----|-----|-----|-----|-----|-----|
|                         |                | 300              | 310 | 320 | 330 |     |     |     |     |     |     |     |     |     |     |     |     |     |     |     |     |     |     |     |     |     |     |     |     |     |     |     |     |     |     |     |     |
| <b>HIV strain</b>       |                | ...              | ... | ... | ... |     |     |     |     |     |     |     |     |     |     |     |     |     |     |     |     |     |     |     |     |     |     |     |     |     |     |     |     |     |     |     |     |
| Sensitive to<br>5M3_D12 | JR-FL          | C                | T   | R   | P   | N   | N   | T   | R   | K   | S   | I   | H   | I   | G   | P   | G   | R   | A   | F   | Y   | T   | T   | G   | E   | I   | I   | G   | D   | I   | R   | Q   | A   | H   | C   |     |     |
|                         | RHPA4259.7     | ...              | H   | ... | ... | N   | ... | ... | A   | ... | K   | ... | ... | ... | ... | ... | ... | ... | ... | ... | ... | ... | ... | ... | ... | ... | ... | ... | ... | ... | ... | ... | ... | ... | ... | ... |     |
|                         | NAB1pre-cl_39x | ...              | S   | ... | ... | T   | ... | ... | A   | ... | K   | ... | ... | ... | ... | ... | ... | ... | ... | ... | ... | ... | ... | ... | ... | ... | ... | ... | ... | ... | ... | ... | ... | ... | ... | ... |     |
|                         | NAB2pre-cl_3   | ...              | L   | ... | ... | R   | ... | N   | ... | W   | ... | V   | ... | K   | N   | ... | ... | ... | ... | ... | ... | ... | ... | ... | ... | ... | ... | ... | ... | ... | ... | ... | ... | ... | ... | ... |     |
|                         | NAB10pre-cl_2  | ...              | ... | ... | ... | R   | ... | S   | ... | ... | K   | ... | ... | ... | ... | ... | ... | ... | ... | ... | ... | ... | ... | ... | ... | ... | ... | ... | ... | ... | ... | ... | ... | ... | ... | ... |     |
|                         | NAB12pre-cl_7  | ...              | ... | ... | ... | P   | ... | A   | ... | D   | ... | ... | ... | ... | ... | ... | ... | ... | ... | ... | ... | ... | ... | ... | ... | ... | ... | ... | ... | ... | ... | ... | ... | ... | ... | ... |     |
| Resistant<br>to 5M3_D12 | 6535.3         | ...              | ... | ... | ... | N   | L   | ... | A   | ... | D   | ... | ... | ... | ... | ... | ... | ... | ... | ... | ... | ... | ... | ... | ... | ... | ... | ... | ... | ... | ... | ... | ... | ... | ... | ... |     |
|                         | AC10.0.29      | ...              | I   | ... | ... | G   | ... | ... | D   | ... | ... | ... | ... | ... | ... | ... | ... | ... | ... | ... | ... | ... | ... | ... | ... | ... | ... | ... | ... | ... | ... | ... | ... | ... | ... | ... |     |
|                         | CAAN5342.A2    | ...              | ... | ... | ... | S   | ... | T   | ... | A   | ... | R   | ... | K   | ... | ... | ... | ... | ... | ... | ... | ... | ... | ... | ... | ... | ... | ... | ... | ... | ... | ... | ... | ... | ... | ... |     |
|                         | PVO.4          | ...              | ... | ... | ... | S   | ... | ... | A   | ... | D   | ... | ... | ... | ... | ... | ... | ... | ... | ... | ... | ... | ... | ... | ... | ... | ... | ... | ... | ... | ... | ... | ... | ... | ... | ... |     |
|                         | QH0692.42      | ...              | ... | ... | ... | G   | ... | ... | A   | ... | D   | ... | ... | ... | ... | ... | ... | ... | ... | ... | ... | ... | ... | ... | ... | ... | ... | ... | ... | ... | ... | ... | ... | ... | ... | ... |     |
|                         | REJO4541.67    | ...              | ... | ... | ... | ... | ... | A   | ... | A   | ... | K   | ... | Y   | ... | ... | ... | ... | ... | ... | ... | ... | ... | ... | ... | ... | ... | ... | ... | ... | ... | ... | ... | ... | ... | ... |     |
|                         | SC422661       | ...              | ... | ... | ... | G   | ... | T   | ... | V   | ... | -   | ... | V   | ... | V   | ... | ... | ... | ... | ... | ... | ... | ... | ... | ... | ... | ... | ... | ... | ... | ... | ... | ... | ... | ... |     |
|                         | THRO4156.18    | ...              | ... | ... | ... | S   | ... | M   | ... | G   | ... | F   | A   | ... | R   | ... | K   | ... | Y   | ... | ... | ... | ... | ... | ... | ... | ... | ... | ... | ... | ... | ... | ... | ... | ... | ... |     |
|                         | TRO.11         | ...              | ... | ... | ... | R   | ... | ... | A   | ... | D   | ... | ... | ... | ... | ... | ... | ... | ... | ... | ... | ... | ... | ... | ... | ... | ... | ... | ... | ... | ... | ... | ... | ... | ... | ... |     |
|                         | WITO4160.33    | ...              | ... | ... | ... | G   | ... | R   | ... | N   | ... | A   | ... | A   | ... | K   | ... | ... | ... | ... | ... | ... | ... | ... | ... | ... | ... | ... | ... | ... | ... | ... | ... | ... | ... | ... |     |
|                         | NAB3pre-cl_43  | ...              | ... | ... | ... | ... | ... | ... | A   | ... | A   | ... | N   | ... | ... | ... | ... | ... | ... | ... | ... | ... | ... | ... | ... | ... | ... | ... | ... | ... | ... | ... | ... | ... | ... | ... | ... |
|                         | NAB4pre-cl_1   | ...              | ... | ... | ... | R   | ... | P   | ... | A   | ... | -   | D   | ... | ... | ... | ... | ... | ... | ... | ... | ... | ... | ... | ... | ... | ... | ... | ... | ... | ... | ... | ... | ... | ... | ... |     |
|                         | NAB5pre-cl_1   | ...              | ... | ... | ... | S   | ... | R   | ... | T   | ... | A   | ... | D   | ... | K   | ... | ... | ... | ... | ... | ... | ... | ... | ... | ... | ... | ... | ... | ... | ... | ... | ... | ... | ... | ... |     |
|                         | ZA110_10.14    | ...              | ... | ... | ... | S   | ... | R   | ... | K   | ... | -   | G   | ... | ... | ... | ... | ... | ... | ... | ... | ... | ... | ... | ... | ... | ... | ... | ... | ... | ... | ... | ... | ... | ... | ... |     |

## References

1. **Jones DT, Taylor WR, and Thornton JM.** 1992. The rapid generation of mutation data matrices from protein sequences. *Comput Appl Biosci* **8**:275-282.
2. **Tamura K, Peterson D, Peterson N, Stecher G, Nei M, and Kumar S.** 2011. MEGA5: molecular evolutionary genetics analysis using maximum likelihood, evolutionary distance, and maximum parsimony methods. *Mol Biol Evol* **28**:2731-2739.
3. **Bartels C, Xia T-h, Billeter M, Güntert P, and Wüthrich K.** 1995. The program XEASY for computer-supported NMR spectral analysis of biological macromolecules. *J. Biomol. NMR* **6**:1-10.
4. **Szyperski T, Güntert P, Otting G, and Wüthrich K.** 1992. Determination of scalar coupling constants by inverse Fourier transformation of in-phase multiplets. *J. Mag. Res.* **99**:552-560.
5. **Güntert P, Mumenthaler C, and Wuthrich K.** 1997. Torsion angle dynamics for NMR structure calculation with the new program DYANA. *J. Mol. Biol.* **273**:283-298.
6. **Koradi R, Billeter M, and Wuthrich K.** 1996. MOLMOL: A program for display and analysis of macromolecular structures. *J. Mol. Graph.* **14**:51-55.
